# Supplementary material for: Assay for Evaluating the Abundance of Vibrio cholerae and Its O1 Serogroup Subpopulation from Water without DNA Extraction
Source: MDPI journal article supplement (doi:10.3390/pathogens11030363), 2022-03-16
Supplement: s1 [file s1]

## Supplementary data

**Table S1.** Determination of limit of detection of sample after concentrating step and testing inhibition in the assay

| CFU/<br>1mL<br>sample | CFU/<br>500µL<br>sample | CFU/<br>10µL<br>concentrate | Cq values with STDEV of Replicates |           |           |      |       |
|-----------------------|-------------------------|-----------------------------|------------------------------------|-----------|-----------|------|-------|
|                       |                         |                             | Replicate                          | Replicate | Replicate | Mean | STDEV |
|                       |                         |                             | 1                                  | 2         | 3         | (Cq) |       |
| 3000                  | 1500                    | 1500                        | 27.0                               | 27.0      | 27.0      | 27.0 | 0.01  |
| 300                   | 150                     | 150                         | 30.2                               | 30.0      | 30.2      | 30.1 | 0.08  |
| 30                    | 15                      | 15                          | 33.5                               | 33.7      | 33.5      | 33.6 | 0.09  |
| 6                     | 3                       | 3                           | 35.8                               | 34.7      | 35.9      | 35.5 | 0.52  |
| 5                     | 2.5                     | 2.5                         | 36.7                               | 36.9      | 36.8      | 36.8 | 0.09  |
| 3                     | 1.5                     | 1.5                         | No amplification                   |           |           |      |       |
